# Supplementary material
Source: publisher figshare collection journal article supplement (https://gsajournals.figshare.com/ndownloader/files/23196431)
Supplement: Supplementary file 1 [file 23196431]

## Sheet: Growth_assay_data
Strain	Day_0	Day_3	Day_4	Day_6	Day_7	Day_11	Assay_Number
Devil_Control	34188	NA	41985	NA	76541	135233	1
Devil_Control	39481	NA	38798	NA	71187	74456	1
Devil_Control	33713	NA	43767	NA	64084	NA	1
Devil_Control	31207	NA	NA	NA	75568	NA	1
Devil_RASL11A	NA	NA	NA	NA	184381	371024	1
Devil_RASL11A	27063	NA	58110	NA	158459	414670	1
Devil_RASL11A	36108	NA	80274	NA	NA	371355	1
Devil_RASL11A	41266	NA	NA	NA	111469	NA	1
DFTD-1a_Control	22301	NA	65027	NA	136359	300410	1
DFTD-1a_Control	24575	NA	68663	NA	141604	310990	1
DFTD-1a_Control	27439	NA	70248	NA	138498	331954	1
DFTD-1a_Control	25077	NA	NA	NA	134461	NA	1
DFTD-1a_RASL11A	19441	NA	38327	NA	67397	134960	1
DFTD-1a_RASL11A	18248	NA	41114	NA	59901	124998	1
DFTD-1a_RASL11A	22375	NA	40005	NA	64261	136414	1
DFTD-1a_RASL11A	24070	NA	NA	NA	60220	NA	1
DFTD-1b_Control	23960	NA	37965	NA	93483	227627	1
DFTD-1b_Control	22813	NA	42384	NA	86597	226704	1
DFTD-1b_Control	26834	NA	44385	NA	88822	253891	1
DFTD-1b_Control	26770	NA	NA	NA	88999	NA	1
DFTD-1b_RASL11A	19327	NA	35582	NA	68200	163282	1
DFTD-1b_RASL11A	22245	NA	37062	NA	73560	182606	1
DFTD-1b_RASL11A	21793	NA	40187	NA	65287	152427	1
DFTD-1b_RASL11A	20676	NA	NA	NA	67417	NA	1
Devil_Control	63294	53260	NA	133165	NA	NA	2
Devil_Control	56922	58018	NA	93395	NA	NA	2
Devil_Control	71398	NA	NA	NA	NA	NA	2
Devil_RASL11A	116433	161998	NA	283683	NA	NA	2
Devil_RASL11A	118447	157041	NA	263340	NA	NA	2
Devil_RASL11A	126439	161856	NA	317564	NA	NA	2
DFTD-1a_Control	86727	125409	NA	212483	NA	NA	2
DFTD-1a_Control	77547	126697	NA	198147	NA	NA	2
DFTD-1a_Control	96815	122258	NA	246403	NA	NA	2
DFTD-1a_RASL11A	56198	95281	NA	156467	NA	NA	2
DFTD-1a_RASL11A	53256	95297	NA	150641	NA	NA	2
DFTD-1a_RASL11A	66893	89723	NA	185885	NA	NA	2
DFTD-1b_Control	40228	55194	NA	112133	NA	NA	2
DFTD-1b_Control	34565	54291	NA	119715	NA	NA	2
DFTD-1b_Control	45773	54544	NA	135443	NA	NA	2
DFTD-1b_RASL11A	46581	65174	NA	116168	NA	NA	2
DFTD-1b_RASL11A	45741	63690	NA	106641	NA	NA	2
DFTD-1b_RASL11A	50142	58533	NA	128418	NA	NA	2
Devil_Control	59815	95776	NA	NA	191107	NA	3
Devil_Control	54975	90307	NA	NA	215279	NA	3
Devil_Control	57329	95407	NA	NA	226227	NA	3
Devil_RASL11A	47948	148050	NA	NA	227355	NA	3
Devil_RASL11A	51298	157763	NA	NA	226627	NA	3
Devil_RASL11A	49990	141795	NA	NA	212563	NA	3
DFTD-1a_Control	30462	87879	NA	NA	164381	NA	3
DFTD-1a_Control	33140	86565	NA	NA	179650	NA	3
DFTD-1a_Control	33960	79654	NA	NA	176620	NA	3
DFTD-1a_RASL11A	29530	74828	NA	NA	136575	NA	3
DFTD-1a_RASL11A	30439	85644	NA	NA	138891	NA	3
DFTD-1a_RASL11A	27188	79422	NA	NA	140488	NA	3
DFTD-1b_Control	34215	83804	NA	NA	152865	NA	3
DFTD-1b_Control	32387	71844	NA	NA	156564	NA	3
DFTD-1b_Control	31211	74984	NA	NA	169217	NA	3
DFTD-1b_RASL11A	31769	77311	NA	NA	151320	NA	3
DFTD-1b_RASL11A	32354	78070	NA	NA	151862	NA	3
DFTD-1b_RASL11A	29498	70244	NA	NA	153016	NA	3
Devil_Control	35407	NA	NA	NA	8885	1397	4
Devil_Control	30671	17725	NA	NA	9295	1527	4
Devil_Control	32909	18047	NA	NA	5571	1627	4
Devil_Control	33516	21421	NA	NA	6508	2324	4
Devil_RASL11A	34605	112878	NA	NA	181342	66522	4
Devil_RASL11A	33889	105907	NA	NA	170099	72347	4
Devil_RASL11A	29797	113866	NA	NA	197540	228671	4
Devil_RASL11A	33167	124044	NA	NA	194537	249802	4
DFTD-1a_Control	19254	52059	NA	NA	136154	224960	4
DFTD-1a_Control	18890	58290	NA	NA	124283	230192	4
DFTD-1a_Control	18685	52377	NA	NA	137287	230292	4
DFTD-1a_Control	18775	54862	NA	NA	124501	223792	4
DFTD-1a_RASL11A	13521	46678	NA	NA	135684	219673	4
DFTD-1a_RASL11A	13104	52220	NA	NA	133673	219228	4
DFTD-1a_RASL11A	13125	59334	NA	NA	137406	216755	4
DFTD-1a_RASL11A	12472	NA	NA	NA	136762	212964	4
DFTD-1b_Control	10941	14990	NA	NA	44007	99670	4
DFTD-1b_Control	10607	16325	NA	NA	44511	99024	4
DFTD-1b_Control	10431	17551	NA	NA	46574	106792	4
DFTD-1b_Control	10715	17534	NA	NA	43865	109221	4
DFTD-1b_RASL11A	14291	27973	NA	NA	80872	138358	4
DFTD-1b_RASL11A	14627	31190	NA	NA	78900	142687	4
DFTD-1b_RASL11A	14431	31312	NA	NA	84745	154762	4
DFTD-1b_RASL11A	14384	32867	NA	NA	75689	133520	4
DFTD-1c_Control	13144	NA	NA	NA	137735	70635	4
DFTD-1c_Control	12232	NA	NA	NA	136370	64510	4
DFTD-1c_Control	13413	71509	NA	NA	139903	52570	4
DFTD-1c_Control	13379	75121	NA	NA	134500	48466	4
DFTD-1c_RASL11A	15438	72959	NA	NA	149628	27879	4
DFTD-1c_RASL11A	16206	66321	NA	NA	143204	26643	4
DFTD-1c_RASL11A	15548	78344	NA	NA	NA	23099	4
DFTD-1c_RASL11A	15311	68640	NA	NA	155672	14620	4
DFTD-2_Control	17336	NA	NA	NA	125003	28232	4
DFTD-2_Control	17922	62085	NA	NA	112493	26571	4
DFTD-2_Control	18128	62573	NA	NA	109082	23717	4
DFTD-2_Control	17456	66242	NA	NA	NA	17663	4
DFTD-2_RASL11A	21580	7975	NA	NA	3187	4386	4
DFTD-2_RASL11A	22702	5017	NA	NA	4931	2443	4
DFTD-2_RASL11A	20985	NA	NA	NA	5160	3252	4
DFTD-2_RASL11A	21476	5441	NA	NA	2274	1764	4
Devil_Control	27164	63593	NA	NA	60707	64853	5
Devil_Control	30455	63158	NA	NA	54900	63311	5
Devil_Control	28009	62380	NA	NA	55707	54876	5
Devil_Control	32627	69538	NA	NA	70221	61552	5
Devil_RASL11A	25860	77465	NA	NA	61696	102351	5
Devil_RASL11A	27877	75130	NA	NA	61099	110807	5
Devil_RASL11A	29135	87866	NA	NA	75087	109237	5
Devil_RASL11A	27659	81546	NA	NA	70365	108395	5
DFTD-1a_Control	21385	32207	NA	NA	69058	NA	5
DFTD-1a_Control	20787	31312	NA	NA	75881	106689	5
DFTD-1a_Control	20829	31102	NA	NA	70961	148687	5
DFTD-1a_Control	20900	32161	NA	NA	72376	141999	5
DFTD-1a_RASL11A	15662	28475	NA	NA	68044	NA	5
DFTD-1a_RASL11A	17909	27537	NA	NA	73623	106077	5
DFTD-1a_RASL11A	14854	29387	NA	NA	72387	167679	5
DFTD-1a_RASL11A	15638	27083	NA	NA	67014	119976	5
DFTD-1b_Control	11946	13202	NA	NA	36286	70714	5
DFTD-1b_Control	12618	12885	NA	NA	34271	66884	5
DFTD-1b_Control	10422	13604	NA	NA	35034	70128	5
DFTD-1b_Control	11585	15296	NA	NA	34443	76527	5
DFTD-1b_RASL11A	15780	20796	NA	NA	41128	66121	5
DFTD-1b_RASL11A	15710	19636	NA	NA	39253	77686	5
DFTD-1b_RASL11A	16779	20939	NA	NA	40904	104538	5
DFTD-1b_RASL11A	16580	19988	NA	NA	36102	114125	5
DFTD-1c_Control	24326	62964	NA	NA	99063	NA	5
DFTD-1c_Control	24834	64193	NA	NA	96477	75106	5
DFTD-1c_Control	22296	62399	NA	NA	88851	63343	5
DFTD-1c_Control	21973	68305	NA	NA	103550	72047	5
DFTD-1c_RASL11A	22716	71830	NA	NA	83997	NA	5
DFTD-1c_RASL11A	24567	69620	NA	NA	80244	64623	5
DFTD-1c_RASL11A	26998	71626	NA	NA	82370	65496	5
DFTD-1c_RASL11A	26818	68916	NA	NA	57448	67620	5
DFTD-2_Control	9210	16628	NA	NA	32431	NA	5
DFTD-2_Control	9357	16362	NA	NA	33296	28470	5
DFTD-2_Control	9148	14677	NA	NA	31266	46371	5
DFTD-2_Control	9024	21092	NA	NA	24735	56416	5
DFTD-2_RASL11A	13500	1957	NA	NA	1905	NA	5
DFTD-2_RASL11A	12974	1282	NA	NA	390	1085	5
DFTD-2_RASL11A	12234	2770	NA	NA	11152	1362	5
DFTD-2_RASL11A	14226	4188	NA	NA	507	3259	5

## Sheet: RASL11A_qPCR
Relative_Expression	Devil_Control	Devil_RASL11A	DFTD-1a_Control	DFTD-1a_RASL11A	DFTD-1b_Control	DFTD-1b_RASL11A	DFTD-1c_Control	DFTD-1c_RASL11A	DFTD-2_Control	DFTD-2_RASL11A	Note
Replicate_1	0.120406	1.10293	0.000282963	5.55765	NA	NA	0.000203475	1.95293	8.07855e-05	0.423703	Extended_Fig_2
Replicate_2	0.134791	0.876814	0.00036334	5.8325	6.75293e-05	4.75072	0.000227283	2.49248	9.17239e-05	0.645236	Extended_Fig_2
Replicate_3	0.130511	1.27441	0.000321622	4.85569	9.07286e-05	3.46209	0.000253385	2.36547	8.77002e-05	0.333407	Extended_Fig_2
